# Supplementary material for: Immunohistochemical profiling of receptor tyrosine kinases, MED12, and TGF-βRII of surgically resected small cell lung cancer, and the potential of c-kit as a prognostic marker
Source: PubMed Central journal article supplement (PMC5503646; doi:10.18632/oncotarget.14410), 2016-12-31
Supplement: oncotarget-08-39711-s001.pdf [file oncotarget-08-39711-s001.pdf]

**Immunohistochemical profiling of receptor tyrosine kinases, MED12, and TGF- $\beta$ RII of surgically resected small cell lung cancer, and the potential of c-kit as a prognostic marker**

**Supplementary Material**

**Supplementary Table S1.** Additional patient characteristics

|                                 | Patients (n=107) |      |
|---------------------------------|------------------|------|
|                                 | No.              | %    |
| Serum level of LDH              |                  |      |
| < ULN                           | 75               | 70.1 |
| $\geq$ ULN                      | 30               | 28.0 |
| Unknown                         | 2                | 1.9  |
| Serum level of ProGRP           |                  |      |
| < ULN                           | 67               | 62.6 |
| $\geq$ ULN                      | 20               | 18.7 |
| Unknown                         | 20               | 18.7 |
| Serum level of NSE              |                  |      |
| < ULN                           | 50               | 46.7 |
| $\geq$ ULN                      | 17               | 15.9 |
| Unknown                         | 40               | 37.4 |
| Approach                        |                  |      |
| VATS                            | 66               | 61.7 |
| Open surgery                    | 41               | 38.3 |
| Perioperative chemoradiotherapy |                  |      |
| Yes                             | 9                | 8.4  |
| No                              | 96               | 89.7 |
| Unknown                         | 2                | 1.9  |
| Salvage surgery                 |                  |      |
| Yes                             | 1                | 0.9  |
| No                              | 105              | 98.1 |
| Unknown                         | 1                | 0.9  |
| PCI                             |                  |      |
| Yes                             | 8                | 7.5  |
| No                              | 97               | 90.7 |
| Unknown                         | 2                | 1.9  |

LDH, lactate dehydrogenase; ULN, upper limit of normal range; ProGRP, pro-gastrin-releasing peptide; NSE, neuron specific enolase; VATS, video-assisted thoracoscopic surgery; PCI, prophylactic cranial irradiation

**Supplementary Table S2.** Adjuvant chemotherapy regimens

|                        | Patients (n=57) |      |
|------------------------|-----------------|------|
|                        | No.             | %    |
| Platinum-based doublet | 54              | 94.7 |
| CBDCA + VP-16          | 22              | 38.6 |
| CDDP + VP-16           | 18              | 31.6 |
| CDDP + CPT-11          | 10              | 17.5 |
| CBDCA + CPT-11         | 4               | 7.0  |
| AMR                    | 1               | 1.8  |
| S-1                    | 2               | 3.5  |

CBDCA, carboplatin; VP-16, etoposide; CDDP, cisplatin; CPT-11, irinotecan; AMR, amrubicin
